# Supplementary material
Source: publisher figshare collection journal article supplement (https://asha.figshare.com/articles/dataset/_/24158745)
Supplement: Supplementary file 1 [file 1]

**Supplemental Material S2.** Motor and rhythmic accuracy means, standard deviations, and correlations in DLD group ( $n = 33$ ).

| Variable                  | <i>M</i> ( <i>SD</i> ) | 1    | 2    | 3    | 4   | 5    | 6    | 7    | 8    | 9    | 10 |
|---------------------------|------------------------|------|------|------|-----|------|------|------|------|------|----|
| 1. MABC-MD                | 7.27 (3.00)            | -    |      |      |     |      |      |      |      |      |    |
| 2. MABC-A&C               | 9.70 (2.94)            | .64* | -    |      |     |      |      |      |      |      |    |
| 3. MABC-BAL               | 8.94 (3.60)            | .57* | .50* | -    |     |      |      |      |      |      |    |
| 4. MABC-Total             | 8.09 (3.55)            | .87* | .76* | .86* | -   |      |      |      |      |      |    |
| 5. Clap marking           | 0.43 (0.34)            | .35  | .31  | .3   | .38 | -    |      |      |      |      |    |
| 6. Drum marking           | 0.53 (0.36)            | .29  | .25  | .14  | .22 | .61* | -    |      |      |      |    |
| 7. Pause marking (clap)   | 0.53 (0.38)            | .28  | .27  | .22  | .31 | .93* | .56* | -    |      |      |    |
| 8. Pause marking (drum)   | 0.60 (0.38)            | .25  | .17  | .18  | .21 | .65* | .89* | .64* | -    |      |    |
| 9. Total accuracy (clap)  | 0.39 (0.36)            | .39  | .35  | .32  | .42 | .97* | .66* | .95* | .71* | -    |    |
| 10. Total accuracy (drum) | 0.48 (0.38)            | .3   | .25  | .14  | .23 | .6*  | .97* | .57* | .93* | .66* | -  |

\* $p < .005$  (Bonferroni adjusted  $p$ -value).

*Note.* Three of the total 36 children in the DLD group were excluded due to missing gross/fine motor scores.
