# Supplementary material
Source: publisher figshare collection journal article supplement (https://asha.figshare.com/articles/dataset/_/24158745)
Supplement: Supplementary file 2 [file 1]

**Supplemental Material S1.** Motor and rhythmic accuracy means, standard deviations, and correlations in TD group ( $n = 21$ ).

| Variable                         | <i>M (SD)</i> | 1    | 2    | 3    | 4    | 5    | 6    | 7    | 8    | 9    | 10 |
|----------------------------------|---------------|------|------|------|------|------|------|------|------|------|----|
| <b>1. MABC-MD</b>                | 9.76 (2.21)   | -    |      |      |      |      |      |      |      |      |    |
| <b>2. MABC-A&amp;C</b>           | 10.19 (2.89)  | .13  | -    |      |      |      |      |      |      |      |    |
| <b>3. MABC-BAL</b>               | 12.14 (2.82)  | -.22 | .22  | -    |      |      |      |      |      |      |    |
| <b>4. MABC-Total</b>             | 10.71 (2.26)  | .56  | .57  | .59  | -    |      |      |      |      |      |    |
| <b>5. Clap marking</b>           | 0.71 (0.35)   | -.02 | .13  | -.21 | 0.08 | -    |      |      |      |      |    |
| <b>6. Drum marking</b>           | 0.79 (0.33)   | -.03 | -.1  | -.28 | -.1  | -.03 | -    |      |      |      |    |
| <b>7. Pause marking (clap)</b>   | 0.75 (0.34)   | -.04 | .01  | -.33 | -.08 | -.04 | .79* | -    |      |      |    |
| <b>8. Pause marking (drum)</b>   | 0.88 (0.27)   | .3   | .08  | -.28 | .14  | .62* | .61* | .67* | -    |      |    |
| <b>9. Total accuracy (clap)</b>  | 0.69 (0.36)   | -.1  | .12  | -.26 | -.03 | .72* | .64* | .99* | .75* | -    |    |
| <b>10. Total accuracy (drum)</b> | 0.77 (0.35)   | .03  | -.04 | -.25 | -.03 | .71* | .98* | .78* | .71* | .72* | -  |

\* $p < .005$  (Bonferroni adjusted  $p$ -value).
