# Supplementary material
Source: publisher figshare collection journal article supplement (https://asha.figshare.com/articles/dataset/_/24158745)
Supplement: Supplementary file 3 [file 1]

**Supplemental Material S3.** Speech sound and rhythmic accuracy means, standard deviations, and correlations in DLD group ( $n = 36$ ).

| Variable                 | <i>M</i> ( <i>SD</i> ) | 1    | 2    | 3    | 4    | 5    | 6    | 7 |
|--------------------------|------------------------|------|------|------|------|------|------|---|
| 1. BBToP-CI              | 72.25 (11.67)          | -    |      |      |      |      |      |   |
| 2. Clap marking          | 0.43 (0.34)            | -.17 | -    |      |      |      |      |   |
| 3. Drum marking          | 0.53 (0.36)            | -.19 | .61* | -    |      |      |      |   |
| 4. Pause marking (clap)  | 0.53 (0.38)            | -.1  | .93* | .56* | -    |      |      |   |
| 5. Pause marking (drum)  | 0.60 (0.38)            | -.26 | .65* | .89* | .64* | -    |      |   |
| 6. Total accuracy (clap) | 0.39 (0.36)            | -.18 | .97* | .66* | .95* | .71* | -    |   |
| 7. Total accuracy (drum) | 0.48 (0.38)            | -.25 | .6*  | .97* | .57* | .93* | .66* | - |

\*  $p < .007$  (Bonferroni adjusted  $p$ -value).
